# Supplementary material for: Smartphone-Based Body Location-Independent Functional Mobility Analysis in Patients with Parkinson’s Disease: A Step towards Precise Medicine
Source: MDPI journal article supplement (doi:10.3390/jpm12050826), 2022-05-19
Supplement: s1 [file s1]

# Smartphone-Based Body Location-Independent Functional Mobility Analysis in Patients with Parkinson's Disease: A Step towards Precise Medicine

Diogo Vila-Viçosa <sup>1</sup>, Mariana Leitão <sup>2</sup>, Raquel Bouça-Machado <sup>2,3</sup>, Filipa Pona-Ferreira <sup>2</sup>, Sara Alberto <sup>1</sup>,  
Joaquim J. Ferreira <sup>2,3,4</sup> and Ricardo Matias <sup>1,5,\*</sup>

<sup>1</sup> Kinetikos, 3030-199 Coimbra, Portugal; [dvicosa@kinetikoshealth.com](mailto:dvicosa@kinetikoshealth.com) (D.V.-V.); [salberto@kinetikoshealth.com](mailto:salberto@kinetikoshealth.com) (S.A.)

<sup>2</sup> CNS—Campus Neurológico Sénior, 2560-280 , Portugal; [marianaleitao.ft@gmail.com](mailto:marianaleitao.ft@gmail.com) (M.L.); [raquelbouca@cns-campus.com](mailto:raquelbouca@cns-campus.com) (R.B.-M.); [filipaponaferreira@campus.ul.pt](mailto:filipaponaferreira@campus.ul.pt) (F.P.-F.); [joaquimjferreira@cns-campus.com](mailto:joaquimjferreira@cns-campus.com) (J.J.F.)

<sup>3</sup> Instituto de Medicina Molecular João Lobo Antunes, 1649-028 Lisbon, Portugal

<sup>4</sup> Laboratory of Clinical Pharmacology and Therapeutics, Faculdade de Medicina, Universidade de Lisboa, 1649-028 Lisbon, Portugal

<sup>5</sup> Physics Department & Institute of Biophysics and Torres Vedras Biomedical Engineering (IBEB), Faculty of Sciences, University of Lisbon, Campo Grande, 1749-016 Lisbon, Portugal

\* Correspondence: [rmatias@kinetikoshealth.com](mailto:rmatias@kinetikoshealth.com)

## Supplementary Materials

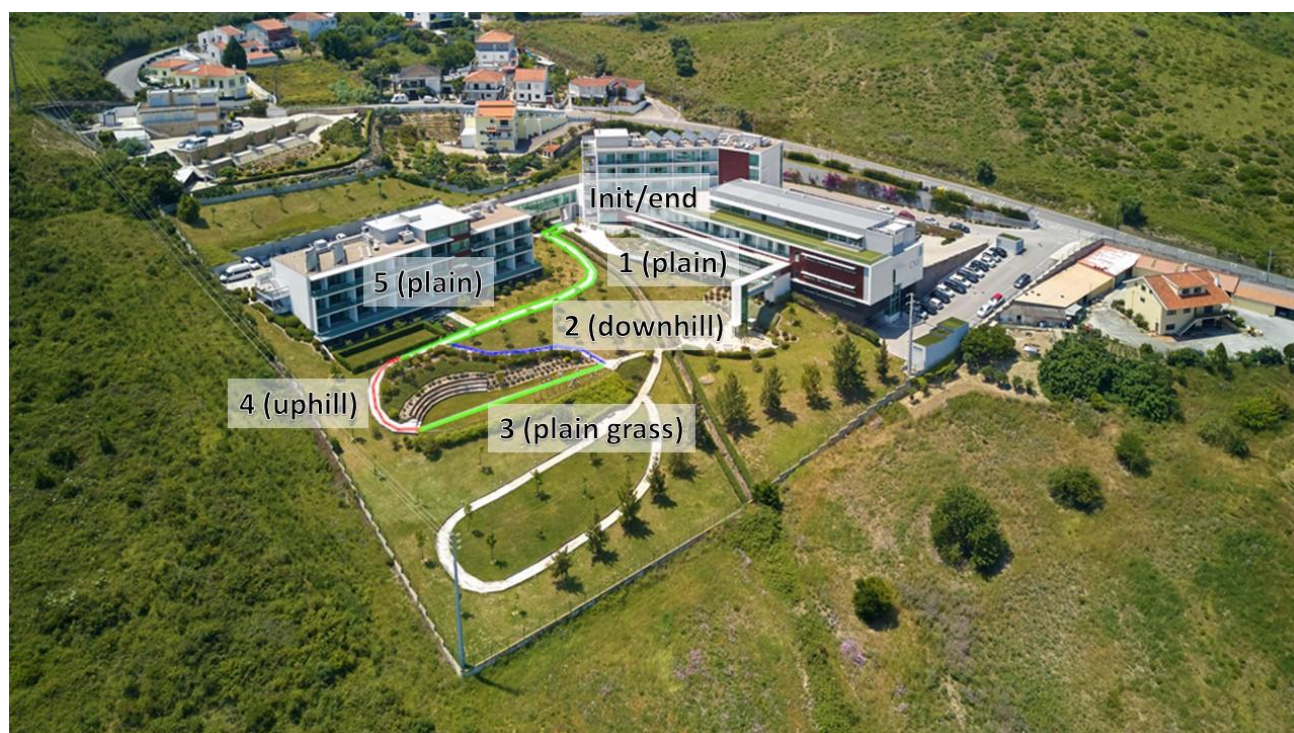

Figure S1: Global aerial view of the garden where the trial was performed.

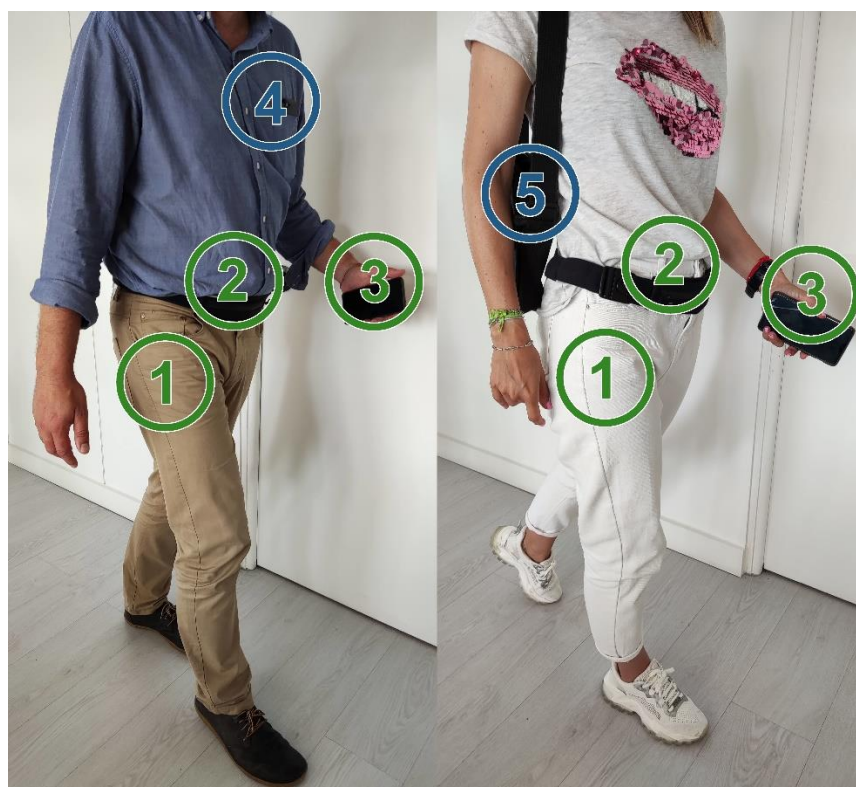

Figure S2: Representative smartphone locations: 1, 2 and 3 correspond, respectively, to Pants, Belt and Hand, which all 20 subjects carried. 4 and 5 correspond to Pocket and Bag, carried by 10 subjects each.

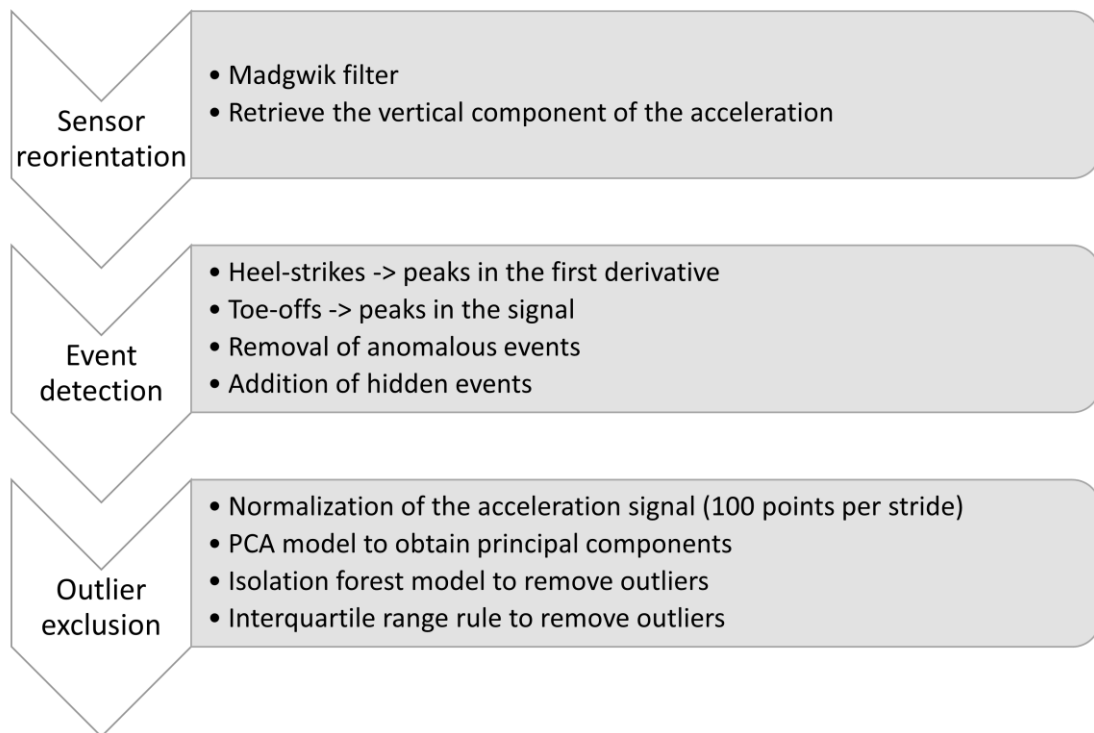

Figure S3: Pipeline of data processing comprising three main steps: sensor orientation, event detection and outlier exclusion.

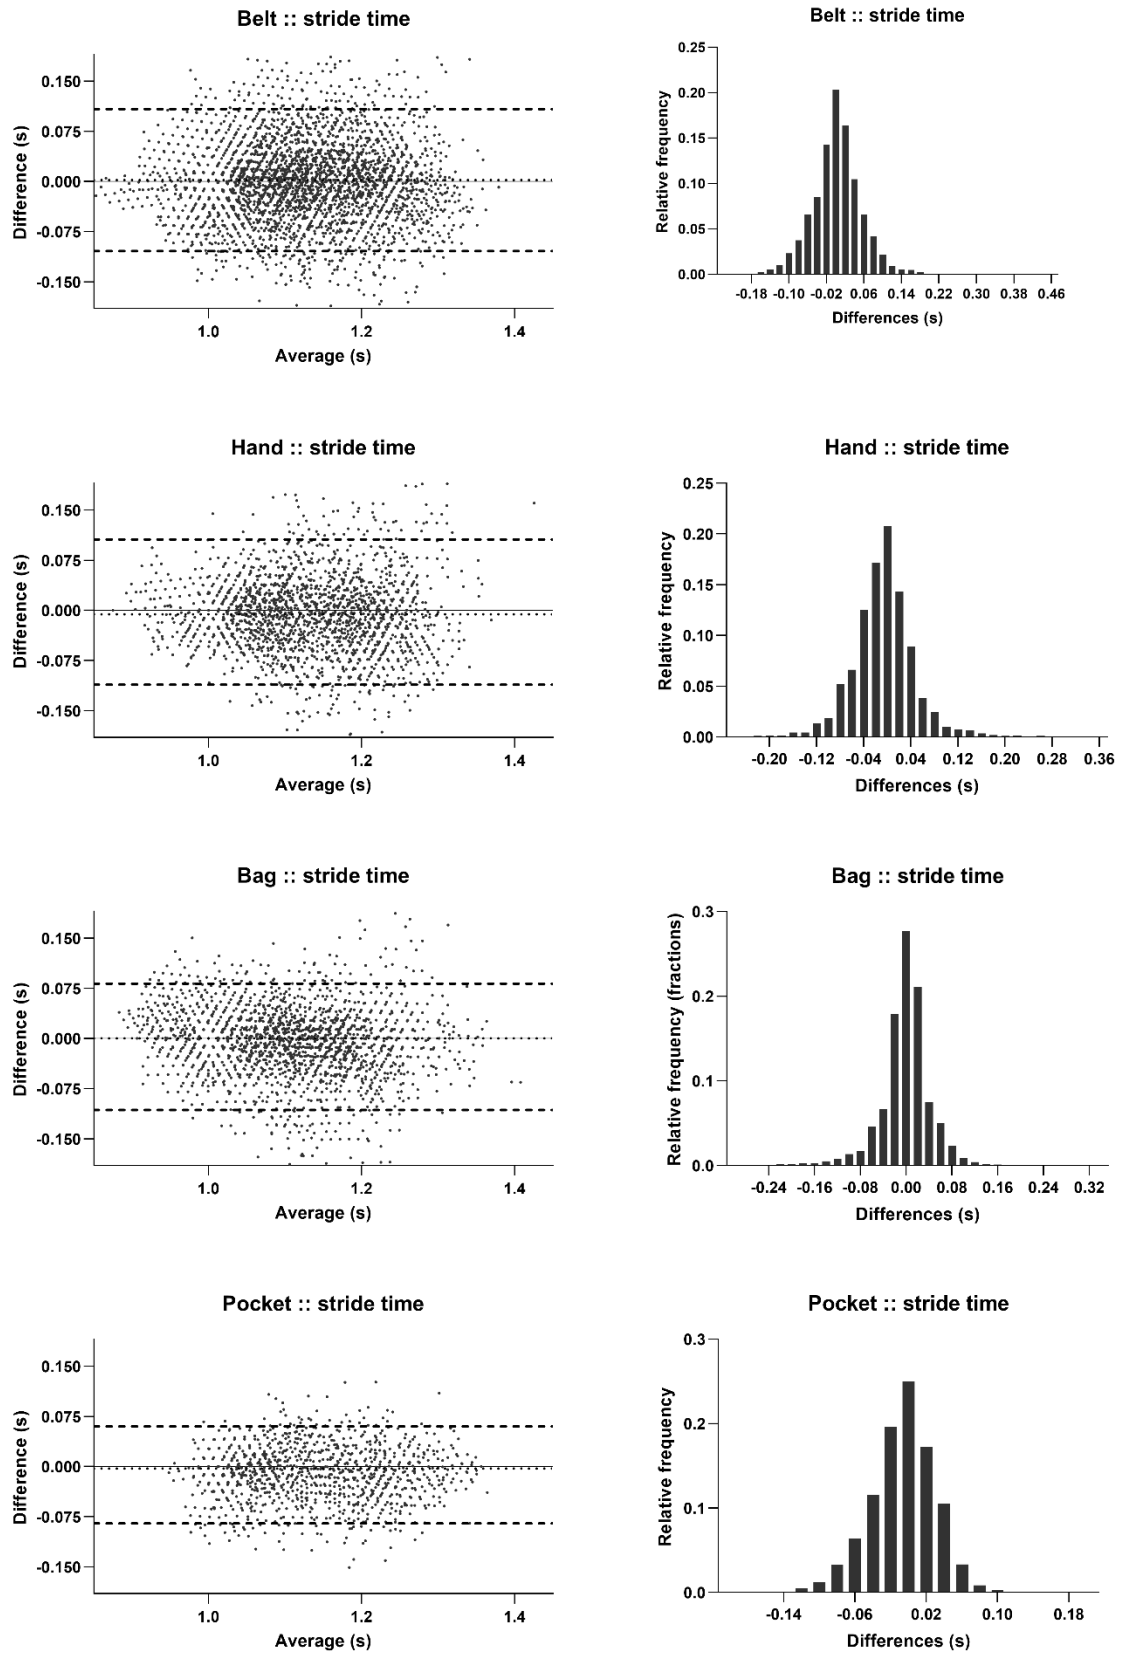

Figure S4: Bland-Altman comparison of the Pants stride time with those for all other locations. Dashed lines represent bias (median) and LoA (quantiles 2.5% and 97.5%).

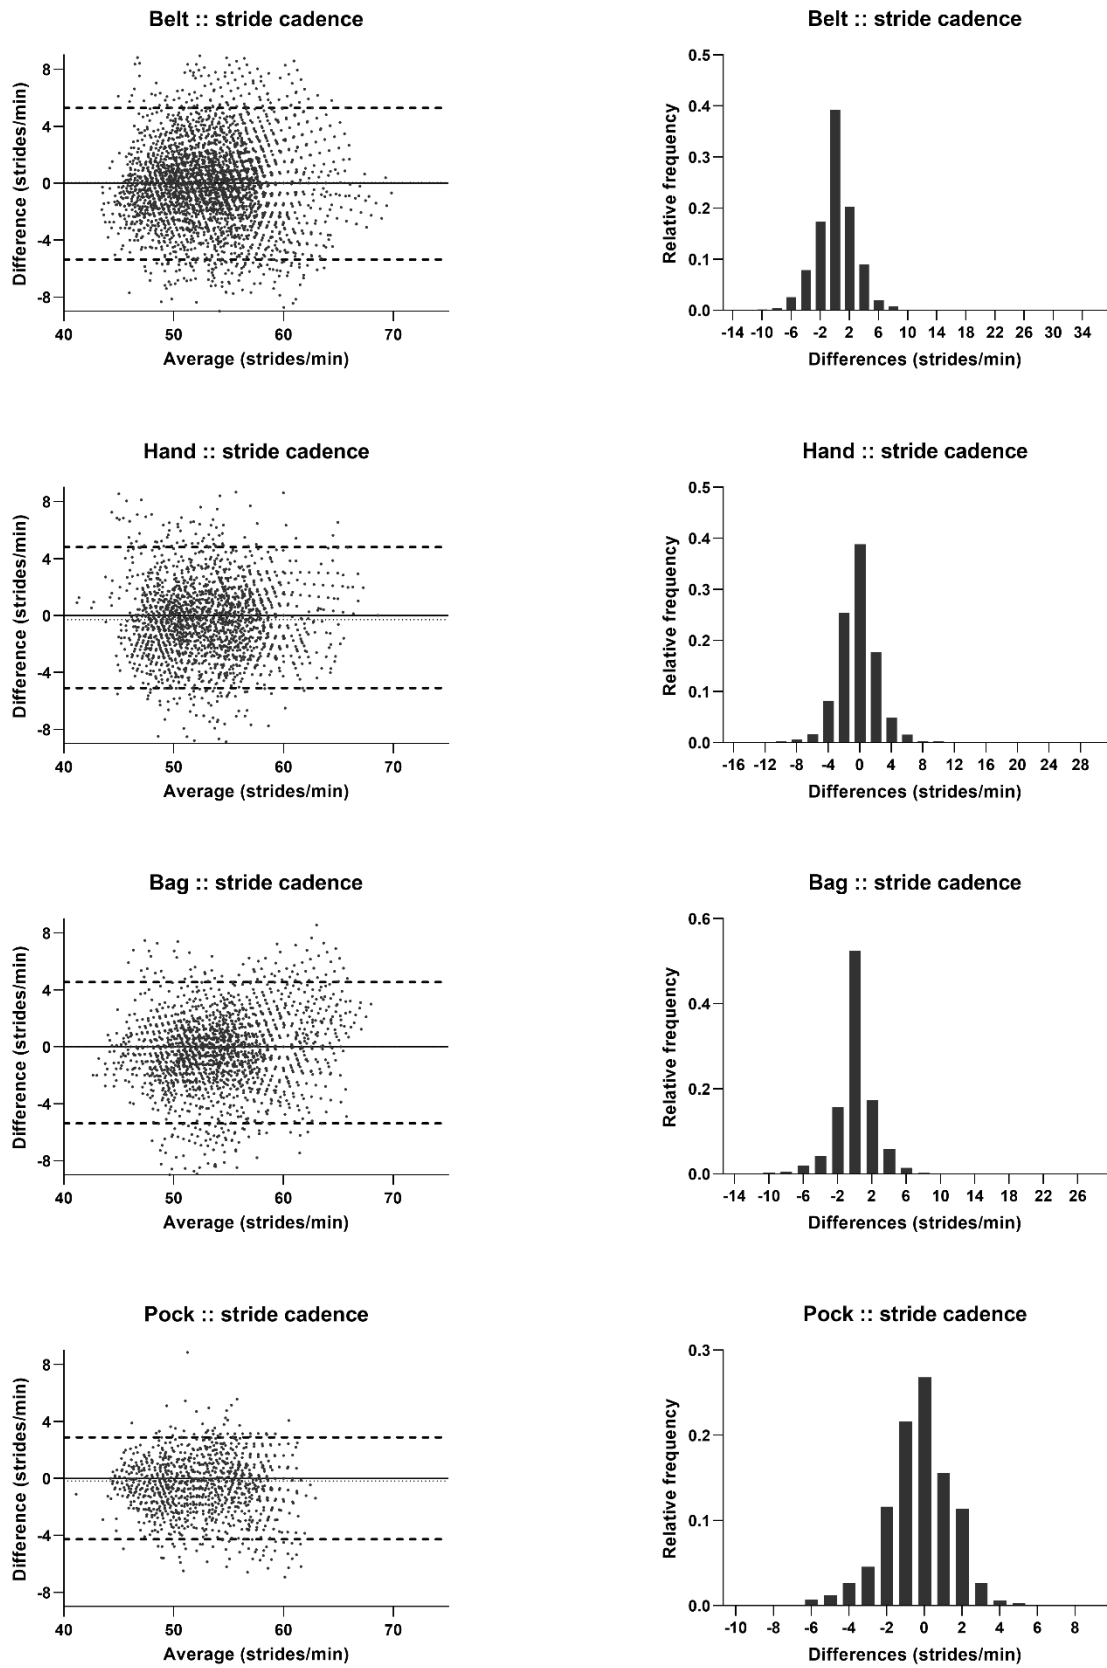

Figure S5: Bland-Altman comparison of the Pants stride cadence with those for all other locations. Dashed lines represent bias (median) and LoA (quantiles 2.5% and 97.5%).

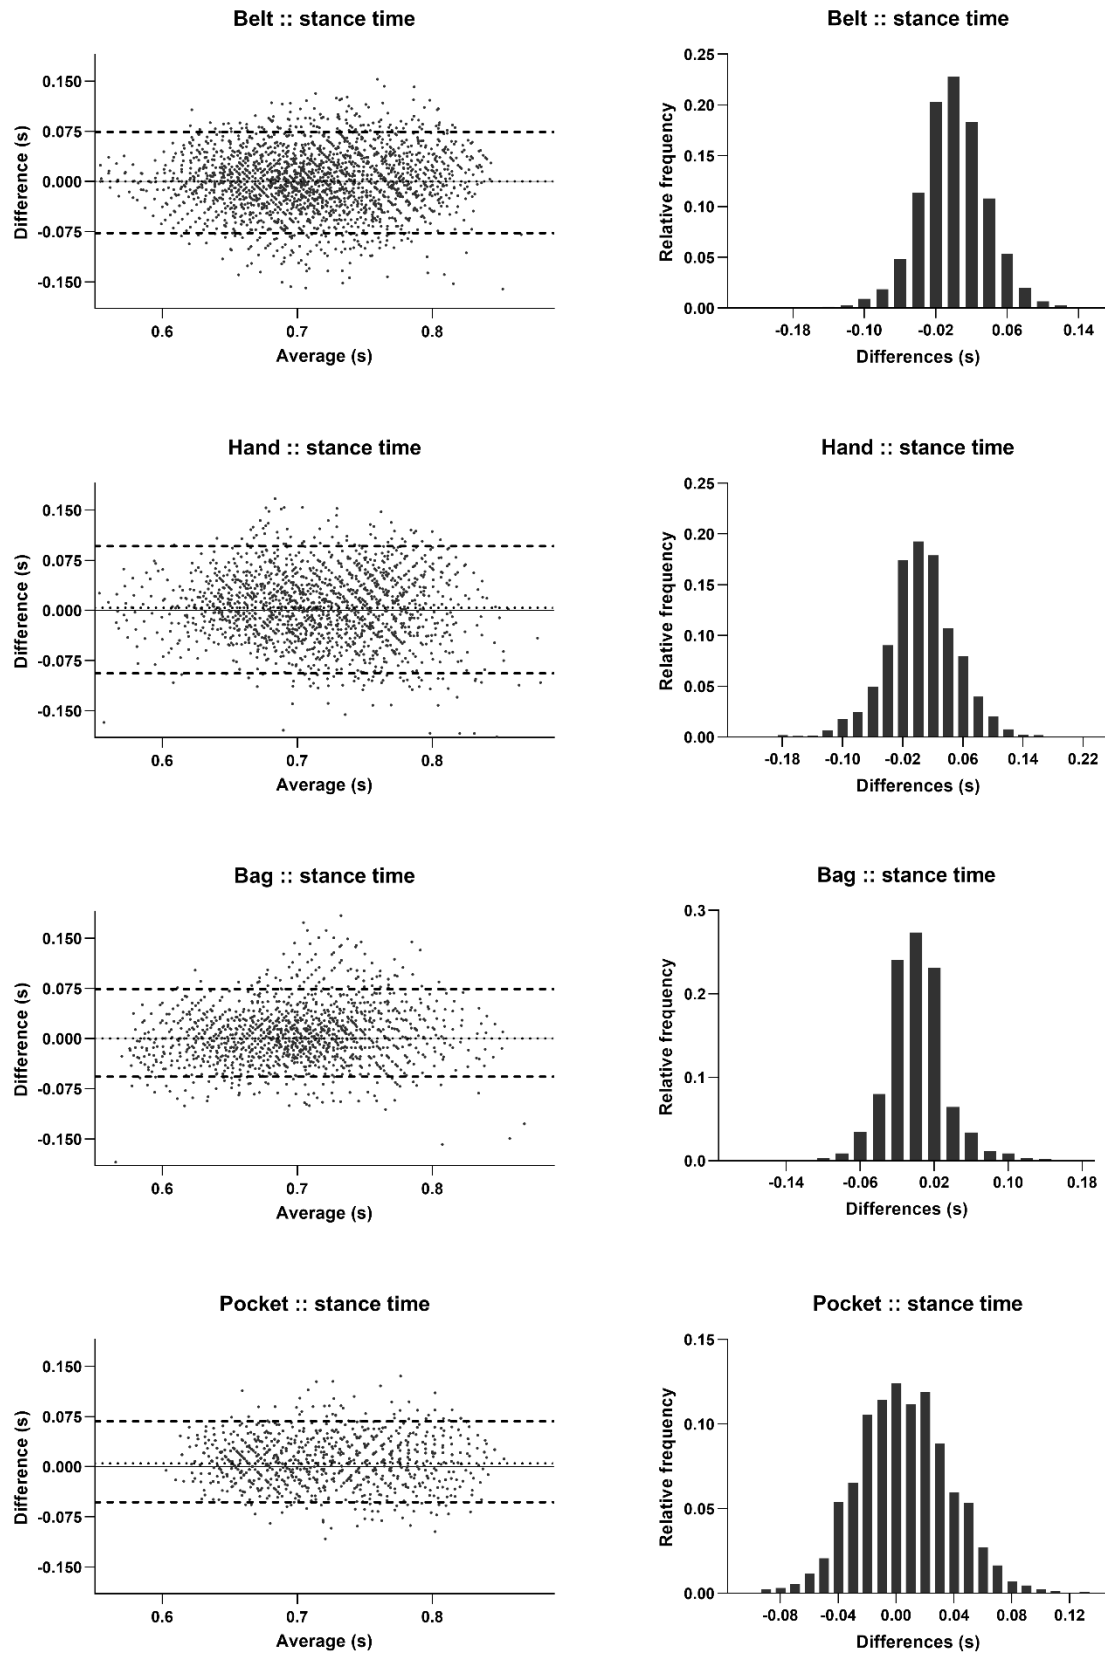

Figure S6: Bland-Altman comparison of the Pants stance time with those for other locations. Dashed lines represent bias (median) and LoA (quantiles 2.5% and 97.5%).

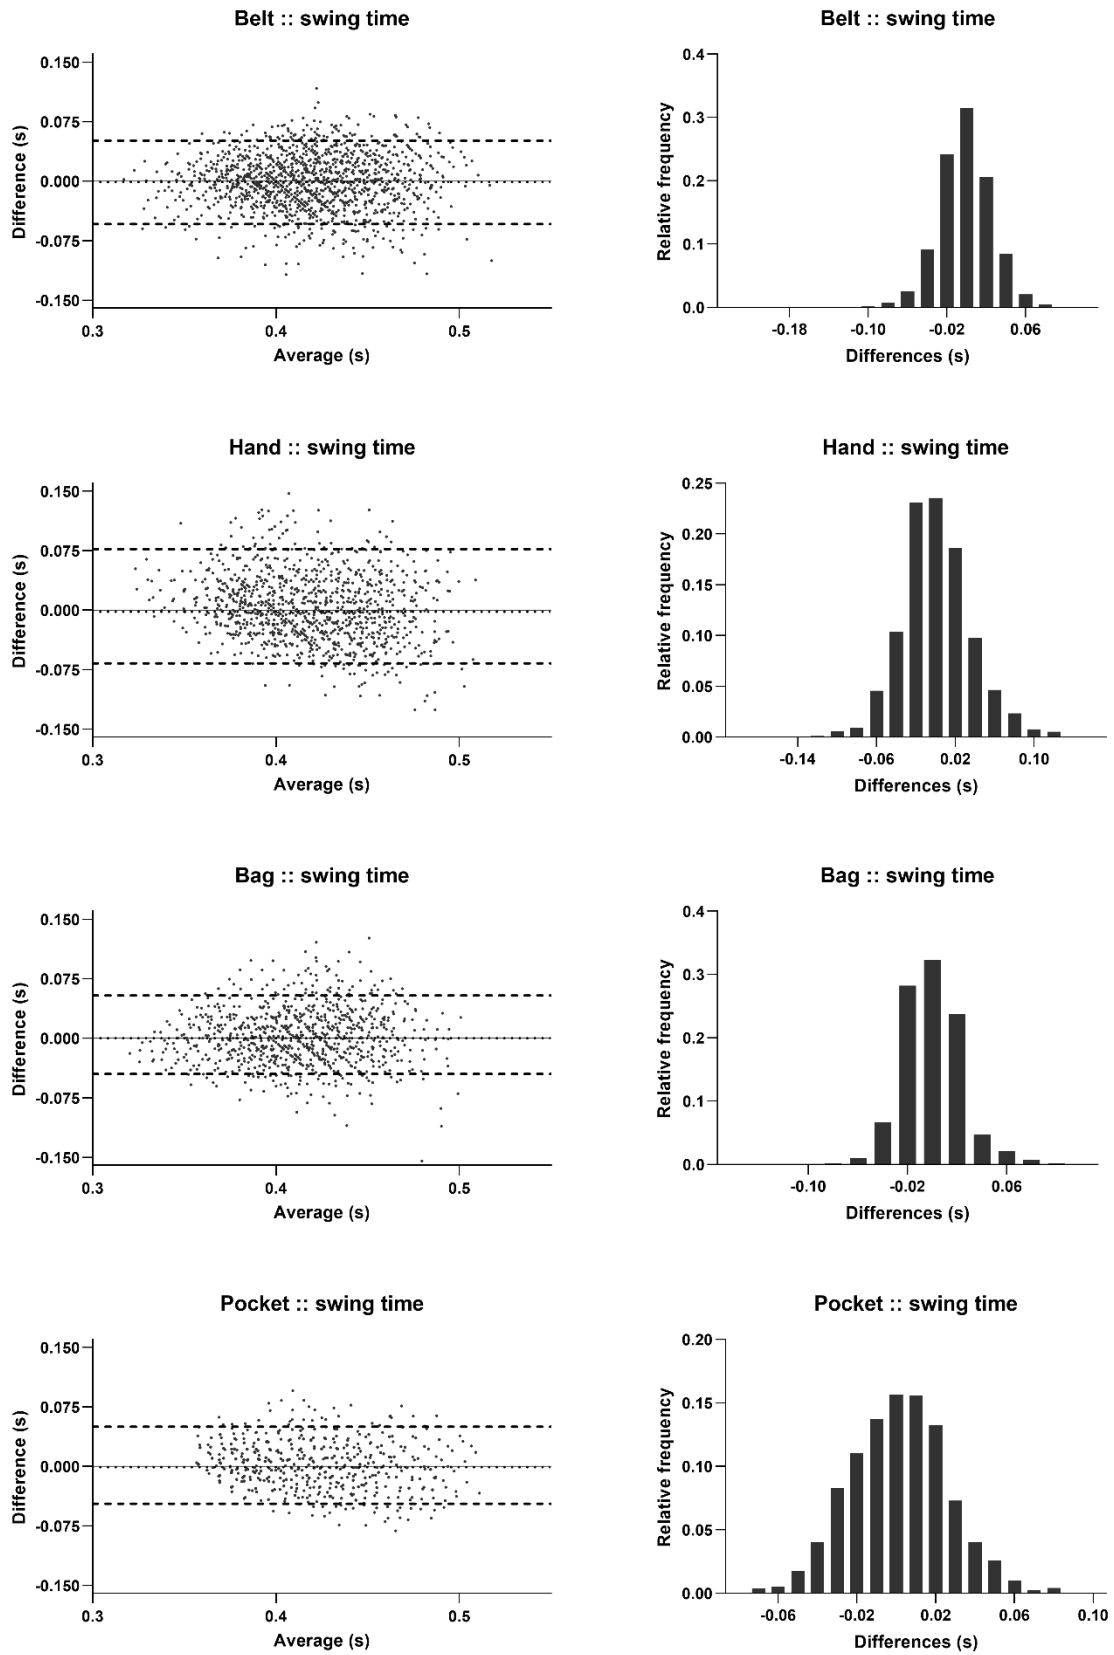

Figure S7: Bland-Altman comparison of the Pants swing time with those for all other locations. Dashed lines represent bias (median) and LoA (quantiles 2.5% and 97.5%).

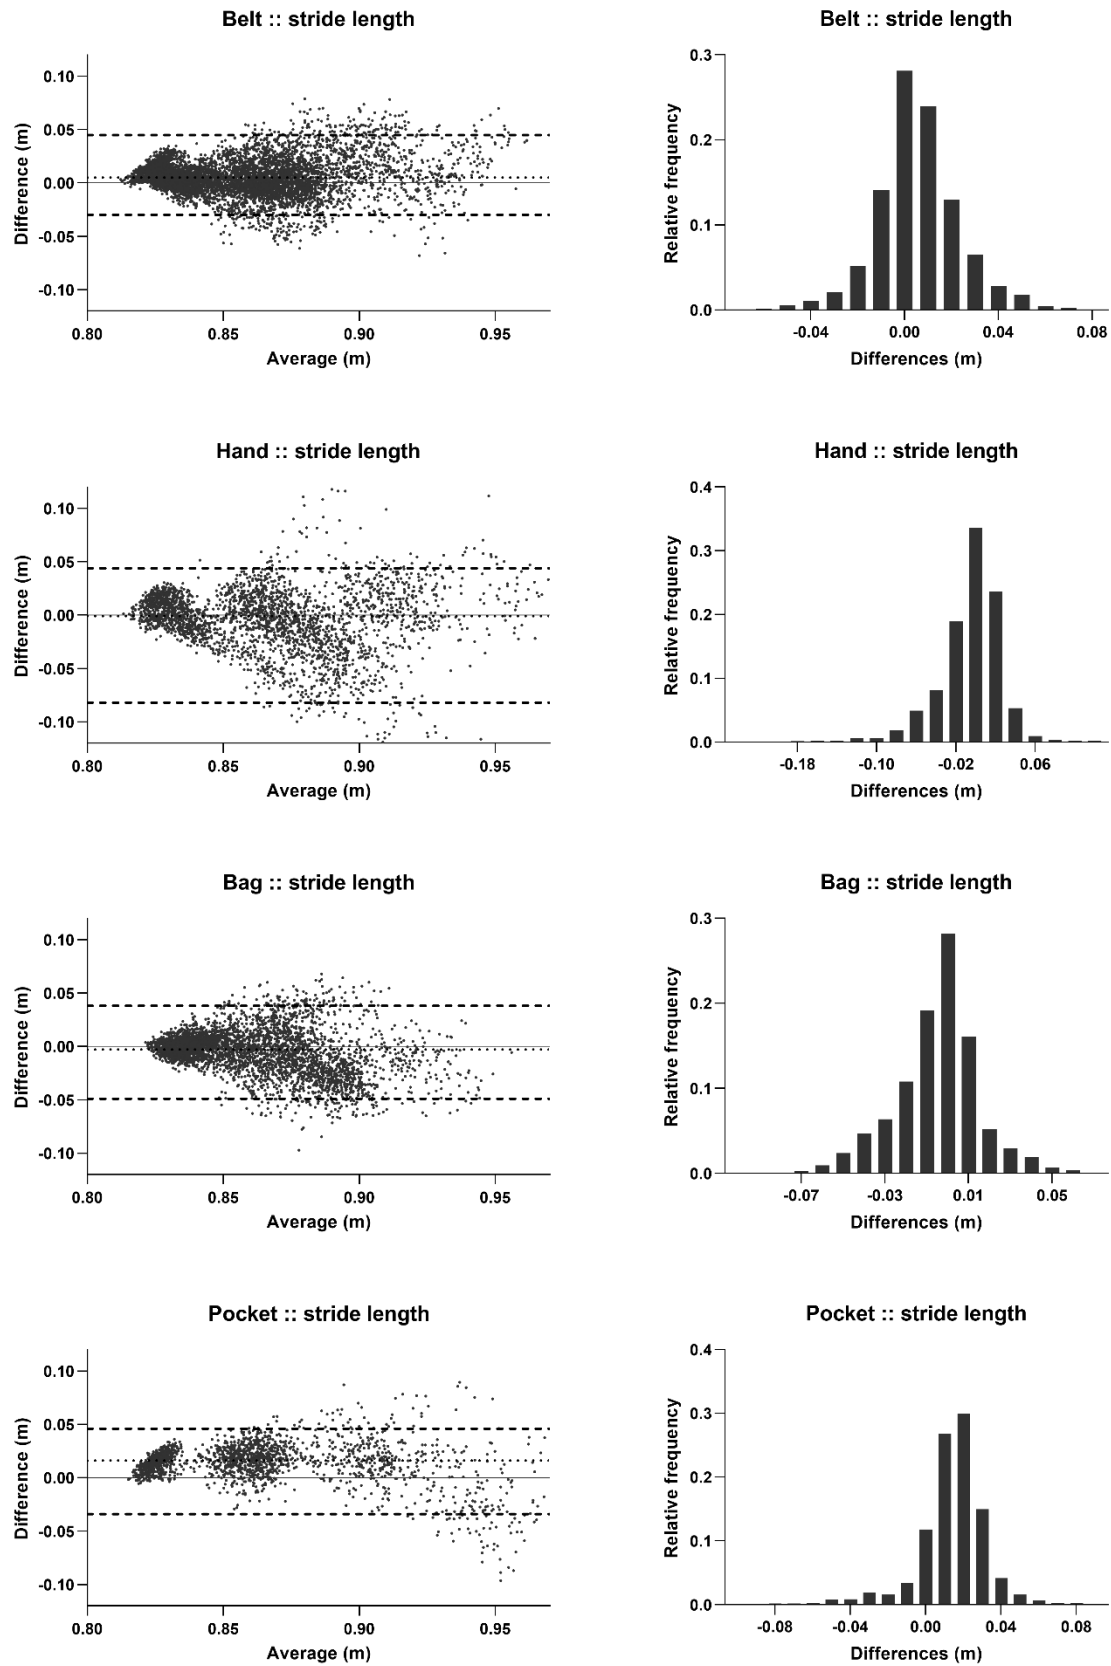

Figure S8: Bland-Altman comparison of the Pants stride length with those for all other locations. Dashed lines represent bias (median) and LoA (quantiles 2.5% and 97.5%).



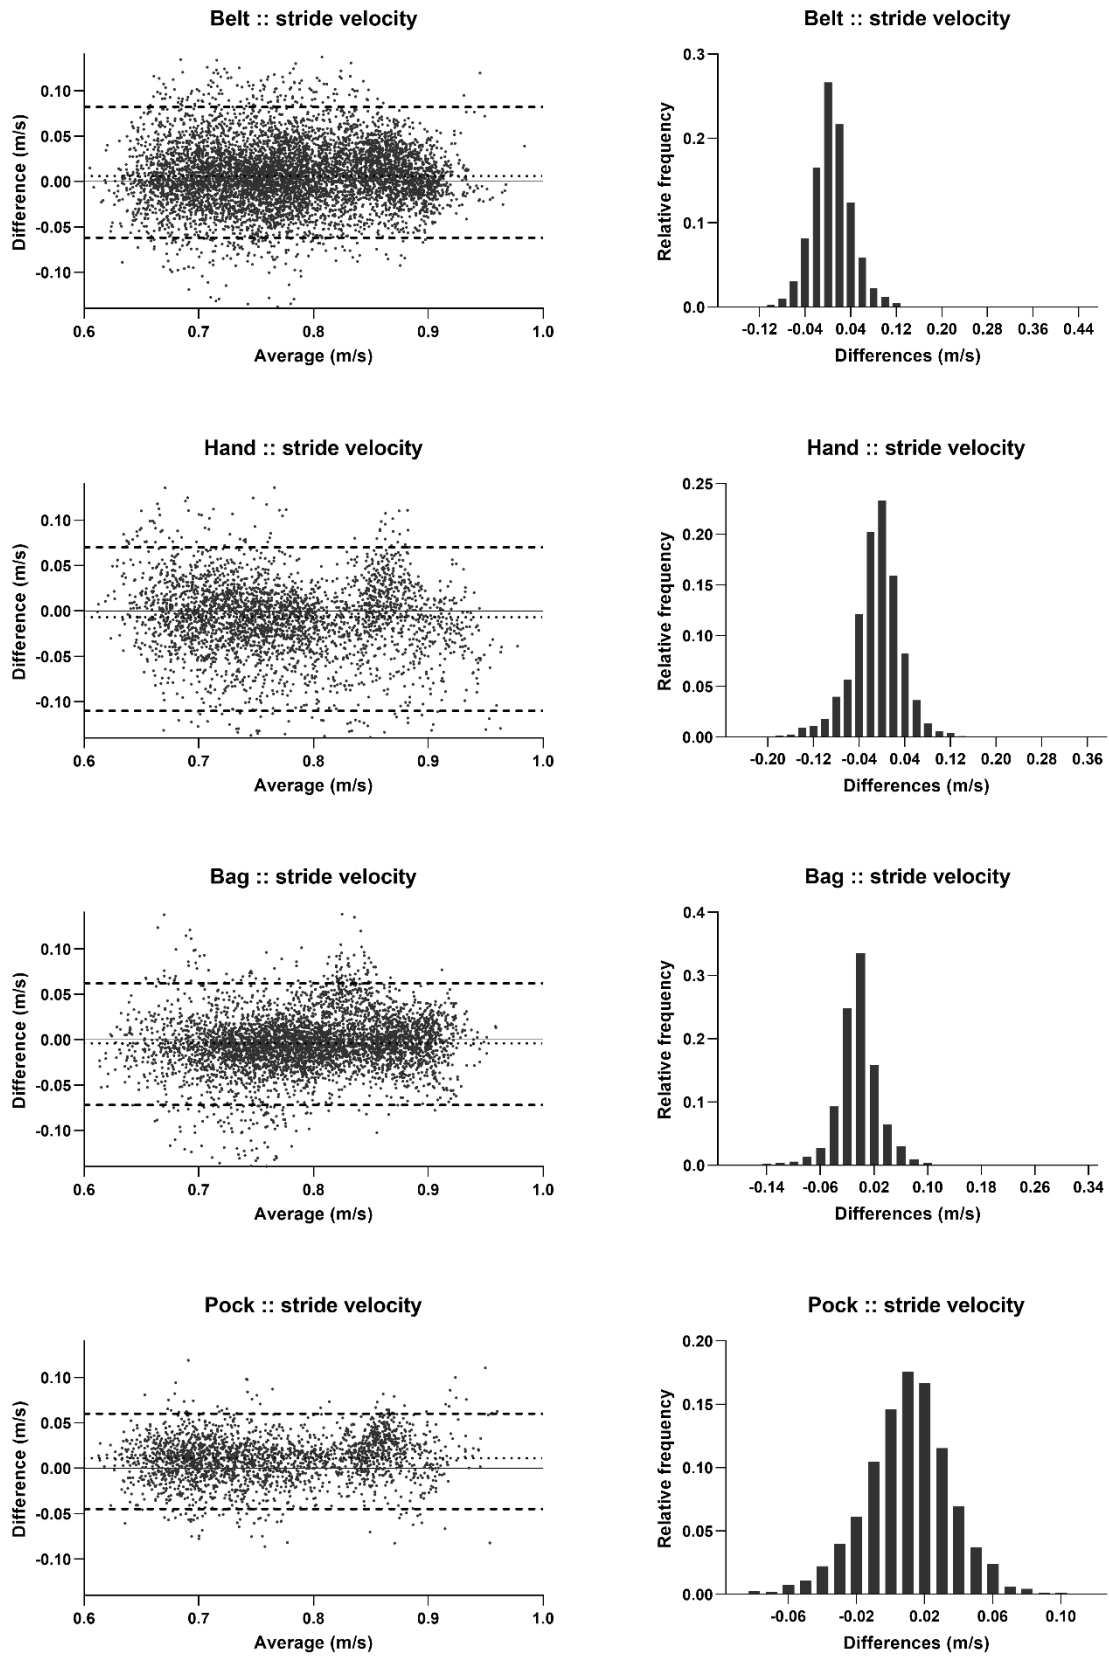

Figure S9: Bland-Altman comparison of the Pants stride velocity with those for all other locations. Dashed lines represent bias (median) and LoA (quantiles 2.5% and 97.5%).

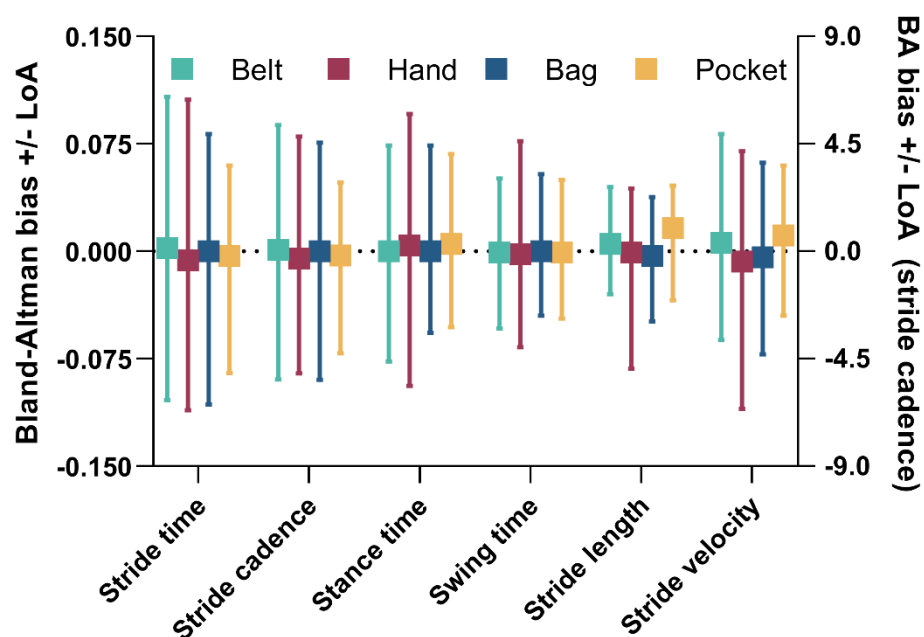

Figure S10: Agreement between gait parameters for Pants and for the other smartphone locations. Bias and LoA from the Bland-Altman analysis are shown.
